# Supplementary material
Source: PubMed Central journal article supplement (PMC6331049)
Supplement: jamaoncol-5-45-s002.pdf [file jamaoncol-5-45-s002.pdf]

## Supplementary Online Content

Buzdar AU, Suman VJ, Meric-Bernstam F, et al. Disease-free and overall survival among patients with operable HER2-positive breast cancer treated with sequential vs concurrent chemotherapy: the ACOSOG Z1041 (Alliance) randomized clinical trial. *JAMA Oncol*. Published online September 6, 2018. doi:10.1001/jamaoncol.2018.3691

**eTable 1.** Patient and Tumor Characteristics

**eTable 2.** Disease Events

**eTable 3.** Sites of Distant Disease Recurrence and Second Primaries

This supplementary material has been provided by the authors to give readers additional information about their work.

**eTable 1. Patient and Tumor Characteristics**

| Characteristic                               | No. of Patients (%) |                  |
|----------------------------------------------|---------------------|------------------|
|                                              | Arm 1<br>(n=138)    | Arm 2<br>(n=142) |
| Median age in years (range)                  | 50 (30-76)          | 50 (28-76)       |
| Race (self-reported)                         |                     |                  |
| White                                        | 118 (85.5%)         | 114 (80.2%)      |
| Black or African American                    | 13 (9.4%)           | 16 (11.3%)       |
| Asian                                        | 3 (2.2%)            | 5 (3.5%)         |
| American Indian or Alaska Native             | 2 (1.4%)            | 2 (1.4%)         |
| Not reported                                 | 2 (1.4%)            | 5 (3.5%)         |
| Ethnicity (self-reported)                    |                     |                  |
| Hispanic or Latino                           | 26 (18.8%)          | 38 (26.8%)       |
| Not Hispanic or Latino                       | 110 (79.7%)         | 101 (71.1%)      |
| Not reported                                 | 2 (1.4%)            | 1 (2.2%)         |
| Body mass index                              |                     |                  |
| Underweight/normal (BMI < 25.0)              | 43 (31.2%)          | 46 (32.4%)       |
| Overweight/obese (BMI ≥ 25.0)                | 95 (68.8%)          | 96 (67.6%)       |
| ECOG performance status                      |                     |                  |
| 0                                            | 129 (93.5%)         | 128 (90.1%)      |
| 1                                            | 9 (6.5%)            | 14 (9.9%)        |
| Clinical tumor stage                         |                     |                  |
| T1                                           | 8 (5.8%)            | 10 (7.0%)        |
| T2                                           | 76 (55.1%)          | 78 (54.9%)       |
| T3                                           | 41 (29.7%)          | 41 (28.9%)       |
| T4                                           | 13 (9.4%)           | 13 (9.2%)        |
| Clinical nodal stage                         |                     |                  |
| N0                                           | 49 (35.5%)          | 52 (36.6%)       |
| N1                                           | 71 (51.5%)          | 82 (57.8%)       |
| N2                                           | 7 (5.1%)            | 7 (4.9%)         |
| N3                                           | 11 (8.0%)           | 1 (0.7%)         |
| Hormone receptor status                      |                     |                  |
| ER positive/PR positive                      | 49 (35.5%)          | 59 (41.6%)       |
| ER positive/PR negative                      | 31 (22.5%)          | 23 (16.2%)       |
| ER negative/PR positive                      | 4 (2.9%)            | 2 (1.4%)         |
| ER negative/PR negative                      | 54 (39.1%)          | 58 (40.8%)       |
| Surgery performed                            |                     |                  |
| yes                                          | 130 (94.2%)         | 138 (97.2%)      |
| no, patient refusal                          | 4 (2.9%)            | 2 (1.4%)         |
| no, physician discretion                     | 2 (1.4%)            | 1 (0.7%)         |
| no, second primary diagnosis                 | 1 (0.7%)            | 0                |
| no, drop in LVEF/developed pulmonary nodules | 0                   | 1 (0.7%)         |
| no, death due to other causes                | 1 (0.7%)            | 0                |

|                                                    |             |             |
|----------------------------------------------------|-------------|-------------|
| Surgical findings                                  |             |             |
| pCR in breast and nodes                            | 73 (52.9%)  | 71 (50.0%)  |
| pCR in breast, residual disease in nodes           | 5 (3.6%)    | 6 (4.2%)    |
| residual disease in breast but not in the nodes    | 35 (25.4%)  | 30 (21.1%)  |
| residual disease in breast and nodes               | 17 (12.3%)  | 30 (21.1%)  |
| residual disease in breast, nodes were not sampled | 0           | 1 (0.7%)    |
| surgery not performed                              | 8 (5.8%)    | 4 (2.8%)    |
| Trastuzumab after surgical resection               | n=130       | n=138       |
| yes                                                | 121 (93.1%) | 131 (94.9%) |
| no, due to cardiotoxicity                          | 5 (3.8%)    | 2 (1.5%)    |
| no, due to cytokine release syndrome               | 0           | 1 (0.7%)    |
| no, due to disease progression                     | 1 (0.8%)    | 0           |
| not reported                                       | 3 (2.3%)    | 4 (2.9%)    |

BMI – body mass index; ECOG – Eastern Cooperative Oncology Group; ER – estrogen receptor; HER2 – human epidermal growth factor receptor 2; LVEF – left ventricular ejection fraction; N – node; pCR – pathologic complete response; PR – progesterone receptor; T - tumor

**eTable 2. Disease Events**

| First disease event       | Vital status | Arm 1: FEC → P+T<br>(n=138) | Arm 2: P+T → FEC+T<br>(n=142) |
|---------------------------|--------------|-----------------------------|-------------------------------|
| None                      | alive        | 116                         | 115                           |
|                           | death        | 2                           | 2                             |
| Local/regional recurrence | alive        | 5                           | 3                             |
|                           | death        | 0                           | 3                             |
| Distant recurrence        | alive        | 7                           | 10                            |
|                           | death        | 6                           | 6                             |
| Second primary            | alive        | 2                           | 2                             |
|                           | death        | 0                           | 1                             |

FEC – 5-fluorouracil, epirubicin and cyclophosphamide; P – paclitaxel; T - trastuzumab

**eTable 3.** Sites of Distant Disease Recurrence and Second Primaries

FEC – 5-fluorouracil, epirubicin and cyclophosphamide; P – paclitaxel; T - trastuzumab

|                    | Anatomic sites                           | Arm 1:<br>FEC → P+T<br>(n=15) | Arm 2:<br>P+T → FEC+T<br>(n=19) |
|--------------------|------------------------------------------|-------------------------------|---------------------------------|
| Distant recurrence | bone                                     | 2                             | 5                               |
|                    | bone + liver                             | 0                             | 1                               |
|                    | brain                                    | 5                             | 2                               |
|                    | hilar, non-IP or mediastinal lymph nodes | 0                             | 3                               |
|                    | kidney                                   | 1                             | 0                               |
|                    | liver                                    | 3                             | 2                               |
|                    | lung                                     | 1                             | 3                               |
|                    | sub pectoral lymph nodes                 | 1                             | 0                               |
| Second primary     | malignant melanoma                       | 1                             | 0                               |
|                    | colorectal cancer                        | 1                             | 0                               |
|                    | lung cancer                              | 0                             | 2                               |
|                    | thyroid cancer                           | 0                             | 1                               |
|                    |                                          |                               |                                 |
